# Supplementary material
Source: HighWire-hosted journal article supplement (doi:10.1101/rna.079418.122)
Supplement: Supplemental_Information.docx [file Supplemental_Information.docx]

**Supplementary Figure Legends**

**Supplemental Figure 1. Alphafold structures of KRGG1 and RESC proteins that contain ARM/HEAT-like tandem helical repeat structures with predicted aligned error plots.**

**Supplemental Figure 2. Glycerol gradients sedimentation showing that loss of KRGG1 does not alter sedimentation of RECC or RESC proteins.** Western analysis of glycerol gradient fractions after sedimentation of crude mitochondrial lysates from cells with KRGG1 expressed (Exp) or repressed (Rep) made in the presence of RNase or RNase Inhibitor fractionated ([Guo et al. 2008](#_ENREF_12)). 2 x 109 BF cells that were grown in the presence or absence of 0.5 µg/mL tet were lysed in 650 µL lysis buffer (10 mM Tris-HCl pH 7.2, 10 mM MgCl2, 100 mM KCl, 1% Triton X-100), centrifuged (12000 rpm, 10 min, 4°C) and 600 µL of the cleared lysates were loaded onto 11 mL 10-30% glycerol gradients. They were centrifuged at 38,000 rpm for 5 h at 4°C in a SW40Ti rotor (Beckman) and 24 500 µL fractions were collected from the top. Alternate fractions were probed with antibodies against RESC (RESC1, RESC11A, or RESC13) or RECC (A1, A2, L1, or A3) components and with antibody against HSP70 as a loading control. Asterisks indicate antibody cross-reactivity with C-terminal Protein A tag on full-length and truncated TAP-tagged KRGG1 in the experimental samples; diamonds indicate bleed-through signal of RESC1 that was incompletely stripped from blot prior to re-probing with RECC antibodies. No notable differences in the sedimentation or abundances of the proteins were evident in samples with KRGG1 repressed compared to those with KRGG1 expressed.

**Supplemental Figure 3. Cumulative growth curves for exclusively expressed KRGG1 mutants.** Growth analysis of cells exclusively expressing various indicated mutant or WT KRGG1 from the tubulin locus (red) compared to cells also expressing tet-induced KRGG1-TAP from the rDNA locus (black) in the BF KRGG1 CN background. Control BF KRGG1 CN parental cell line and derived MGA cell line included as in Figure 4.

**Supplemental Figure 4. Western analysis of expression levels of selected KRGG1 mutants compared to WT. (A)** Western analysis using simultaneous probing for KRGG1-V5 or loading control HSP70 of total cell lysates from cell lines that express c-terminal V5-tagged WT or mutant KRGG1. Samples were made after cells were isolated from transfection when initial growth analyses were performed. **(B)** Amount of KRGG1-V5 signal relative to HSP70 in **(A)** quantified by densitometry.

**Supplemental Figure 5. RT-qPCR analyses showing the impact of exclusive expression of dysfunctional KRGG1 mutants vs. WT on RNA editing *in vivo*.** RT-qPCR assay of indicated dysfunctional mutant cell lines showing that over three days repression of tet-regulated KRGG1 (reg KRGG1) results in decreases of edited A6 amplicon compared to WT, using telomerase reverse transcriptase (TERT) mRNA as an internal control. Total KRGG1 reports both constitutive KRGG1 mutant or WT from tubulin locus as well as tet-regulated KRGG1 from rDNA locus. Never-edited, pre-edited, and edited mRNAs are indicated by brackets.

**Supplemental Figure 6. G-quadruplex structures in A6 and ND8 pre-edited mRNAs.** Comparison of published secondary structures of pre-edited transcripts to sizes of RT-PCR products with or without KRGG1 expression (from Figure 3C) to identify proximate G-quadruplexes in partially edited sequences for A6 (**A**) and ND8 (**B**) ([Leeder et al. 2016](#_ENREF_15)). Colored arrows indicate prominent products in RT-PCR reactions and the sizes of these partially edited products were used to determine the approximate location in the secondary structure where editing stopped presuming that editing had proceeded generally 3’ to 5’. The arrowheads provide references between the mRNA sequences and structures.

**Supplementary Tables**

**Supplementary Table 1.** Trypanosoma brucei proteins that contain RGG repeat domains.

| **Protein Name** | **GeneID** | **Function** | **Reference** |
| --- | --- | --- | --- |
| RESC13 | Tb927.10.10830 | RNA binding in RESC complexes; RNA editing; RNA  annealing and RNA unwinding activities | ([Fisk et al. 2008](#_ENREF_10); [Ammerman et al. 2010](#_ENREF_2)) |
| KRGG3 | Tb927.3.1820 | Initially assigned to RESC complexes, but interactions with RESC appear largely RNA-mediated and RNAi knockdown does not produce defect in editing | ([McAdams et al. 2015](#_ENREF_16)) |
| Nopp44/46 | Tb927.8.750 & Tb927.8.760 | Nucleolar RNA-binding phosphoproteins involved in ribosome biogenesis | ([Jensen et al. 2005](#_ENREF_13)) |
| AGO1 | Tb927.10.10850 | Key component of the RNA-induced silencing complex | ([Shi et al. 2004](#_ENREF_20)) |
| VASA | Tb927.10.14550 | mRNA processing in nuclear periphery granules | ([Kramer et al. 2012](#_ENREF_14)) |
| SCD6 | Tb927.11.550 | mRNA processing in nuclear periphery granules | ([Kramer et al. 2012](#_ENREF_14)) |
| RPS2 | Tb927.10.14600 & Tb927.10.14710 | Component of cytoplasmic ribosomes |  |

**Supplementary Table 2.** Gene IDs for sequences used in multi-species alignment.

| **Species** | **KRGG1** | **RESC6** |
| --- | --- | --- |
| *Leishmania braziliensis* | **LBRM2903_300014700** | **LBRM2903_080017200** |
| *Leishmania tarentolae* | **LtaP30.0890** | **LtaP08.0910** |
| *Leishmania infantum* | **LINF_300013200** | **LINF_080016600** |
| *Leishmania major* | **LMJSD75_300013500** | **LMJSD75_080015800** |
| *Trypanosoma cruzi* | **TcCLB.507927.20** | **C4B63_59g124** |
| *Trypanosoma theileri* | **TM35_000074160** | **TM35_000791110** |
| *Trypanosoma brucei* | **Tb927.6.2230** | **Tb927.5.3010** |
| *Trypanosoma congolense* | **TcIL3000.A.H_000459100** | **TcIL3000.A.H_000421700** |

**Supplementary Table 3.** Sequences of oligonucleotides used in this study.

| **Primer #** | **Primer Description** | **Primer sequence** | **Reference** |
| --- | --- | --- | --- |
| 9962 | KRGG1+pLEW100v5 Gateway (reg copy for KRGG1) FOR | GGGGACAAGTTTGTACAAAAAAGCAGGCTCCAAAATGTTGCGGCCATTCGTC | This Study |
| 9963 | KRGG1+pLEW100v5 Gateway (reg copy for KRGG1) REV | GGGGACCACTTTGTACAAGAAAGCTGGGTCCCTAGTTTGGTGGGAAAGTACCTC | This Study |
| 9964 | KRGG1 5'UTR FOR | GCGAGATGTAGGGAGCGATC | This Study |
| 9966 | KRGG1 5'UTR + BSD REV | TTGAGACAAAGGCTTGGCCATAGTGCTTGGGTCGTCAAACC | This Study |
| 9968 | KRGG1 5'UTR + HYG REV | GGTGAGTTCAGGCTTTTTCATAGTGCTTGGGTCGTCAAACC | This Study |
| 9969 | KRGG1 3'UTR + BSD FOR | TGGTTATGTGTGGGAGGGCTAAAAACACCTCCTTGGCAAGG | This Study |
| 9970 | KRGG1 3'UTR + HYG FOR | GTCCGAGGGCAAAGGAATAGAAACACCTCCTTGGCAAGG | This Study |
| 9971 | KRGG1 3'UTR REV | CTACAAGCTATTTTATTCCTCTTGTCAGTC | This Study |
| 9972 | Nested Phusion FOR  KRGG1 (BSD or HYG) | AAGCGAAGGGGAAGAAAACC | This Study |
| 9973 | Nested Phusion REV  KRGG1 (BSD or HYG) | TAAATTTGCTCTTCACGGCC | This Study |
| 11365 | FOR-RGG1-K294A | TGAGCTCTTAAACCGGCGTGCCAGTTCGTAGAGGATCTTG | This Study |
| 11366 | REV-RGG1-K294A | CAAGATCCTCTACGAACTGGCACGCCGGTTTAAGAGCTCA | This Study |
| 11367 | FOR-RGG1-S448A | CGCCAGGGTGGCCAGTTGGGGCG | This Study |
| 11368 | REV-RGG1-S448A | CGCCCCAACTGGCCACCCTGGCG | This Study |
| 11369 | FOR-RGG1-T522A | CAATTTGCTCGTCCGCGTGGAACCCCACTGT | This Study |
| 11370 | REV-RGG1-T522A | ACAGTGGGGTTCCACGCGGACGAGCAAATTG | This Study |
| 11371 | FOR-RGG1-Q327A | ACCGATTTCTCGTCCGCGGTCGATGGGTCGAC | This Study |
| 11372 | REV-RGG1-Q327A | GTCGACCCATCGACCGCGGACGAGAAATCGGT | This Study |
| 11373 | FOR-RGG1-H486A | GTTATAACCTCTCGAGAAGCCATGTTCTCCGCACCGCT | This Study |
| 11374 | REV-RGG1-H486A | AGCGGTGCGGAGAACATGGCTTCTCGAGAGGTTATAAC | This Study |
| 11375 | FOR-RGG1-R561A | GCCACTTTCTGAAGAGCAGCCCATAGGGCATCAAC | This Study |
| 11376 | REV-RGG1-R561A | GTTGATGCCCTATGGGCTGCTCTTCAGAAAGTGGC | This Study |
| 11451 | Del-LLLN-RGG1-FOR | CCAGGACGAGAAATCGCGGTGCTATCCACATA | This Study |
| 11452 | Del-LLLN-RGG1-REV | TATGTGGATAGCACCGCGATTTCTCGTCCTGG | This Study |
| 11453 | Del-ARR-RGG1-FOR | GACGTACAACGTGAGATCGTGCGGCGAGCG | This Study |
| 11454 | Del-ARR-RGG1-REV | CGCTCGCCGCACGATCTCACGTTGTACGTC | This Study |
| 11455 | D328A-RGG1-FOR | CCCATCGACCCAGGCCGAGAAATCGGTGA | This Study |
| 11456 | D328A-RGG1-REV | TCACCGATTTCTCGGCCTGGGTCGATGGG | This Study |
| 11457 | F342A-RGG1-FOR | CAACTGTGCCGCTACCGCCCGGTGCTATCCACAT | This Study |
| 11458 | F342A-RGG1-REV | ATGTGGATAGCACCGGGCGGTAGCGGCACAGTTG | This Study |
| 11459 | LLLN→AAAA-FOR | GACCCAGGACGAGAAATCGGTGACAGCAGCTGCCGCCTGTGCCGCTACCTTCCGGTGCTAT | This Study |
| 11460 | LLLN→AAAA-REV | ATAGCACCGGAAGGTAGCGGCACAGGCGGCAGCTGCTGTCACCGATTTCTCGTCCTGGGTC | This Study |
| 11461 | N337A-RGG1-FOR | CGGTGACACTACTTCTCGCCTGTGCCGCTACCTTCC | This Study |
| 11462 | N337A-RGG1-REV | GGAAGGTAGCGGCACAGGCGAGAAGTAGTGTCACCG | This Study |
| 11463 | ARR→AAA-FOR | GTACAACGTGAGGCCGCCGCCATCGTGCGGCGAGC | This Study |
| 11464 | ARR→AAA-REV | GCTCGCCGCACGATGGCGGCGGCCTCACGTTGTAC | This Study |
| 11465 | ARR→ADD-FOR | CGTACAACGTGAGGCCGACGACATCGTGCGGCGAGCG | This Study |
| 11466 | ARR→ADD-REV | CGCTCGCCGCACGATGTCGTCGGCCTCACGTTGTACG | This Study |
| 11469 | ARR→RAA-FOR | GGACGTACAACGTGAGCGCGCCGCCATCGTGCGGCGAGCG | This Study |
| 11470 | ARR→RAA-REV | CGCTCGCCGCACGATGGCGGCGCGCTCACGTTGTACGTCC | This Study |
| 11040 | TERT BioMark FOR | GAGCGTGTGACTTCCGAAGG | ([Brenndorfer and Boshart 2010](#_ENREF_5)) |
| 11041 | TERT BioMark REV | AGGAACTGTCACGGAGTTTGC | ([Brenndorfer and Boshart 2010](#_ENREF_5)) |
| 9975 | KRGG1 BioMark FOR | CTCAGGAATTGAAGAACGCA | This Study |
| 9976 | KRGG1 BioMark REV | GCCTCTGTGCAAGAATCTGA | This Study |
| 4942 | ND7 BioMark pre-edited FOR | GCGGGCGGAGCATTATT | ([Carnes et al. 2005](#_ENREF_7)) |
| 4943 | ND7 BioMark pre-edited REV | GATCTACGGTCCCCTCTTTCCT | ([Carnes et al. 2005](#_ENREF_7)) |
| 4940 | ND7 BioMark edited FOR | GCATCCCGCAGCACATG | (Carnes et al., 2005) |
| 4941 | ND7 BioMark edited REV | CTGTACCACGATGCAAATAACCTATAAT | (Carnes et al., 2005) |
| 4928 | A6 BioMark pre-edited FOR | TTGCCTTTGCCAAACTTTTAGAAG | ([Carnes et al. 2005](#_ENREF_7)) |
| 4929 | A6 BioMark pre-edited REV | ATTCTATAACTCCAAAATCACAACTTTCC | ([Carnes et al. 2005](#_ENREF_7)) |
| 5071 | A6 BioMark edited FOR | GATTTATTTTGGTTGCGTTTGTTATTATG | ([Carnes et al. 2005](#_ENREF_7)) |
| 5072 | A6 BioMark edited REV | CAAACCAACAAACAAATACAAATCAAAC | ([Carnes et al. 2005](#_ENREF_7)) |
| 4969 | RPS12 BioMark pre-edited FOR | CGACGGAGAGCTTCTTTTGAATA | ([Carnes et al. 2005](#_ENREF_7)) |
| 4970 | RPS12 BioMark pre-edited REV | CCCCCCACCCAAATCTTT | ([Carnes et al. 2005](#_ENREF_7)) |
| 4967 | RPS12 BioMark edited FOR | CGTATGTGATTTTTGTATGGTTGTTG | (Carnes et al., 2005) |
| 4968 | RPS12 BioMark edited REV | ACACGTCGGTTACCGGAACT | (Carnes et al., 2005) |
| 4935 | MURF2 BioMark pre-edited FOR | GATTTTAAGATTGGCTTTGATTGA | ([Carnes et al. 2005](#_ENREF_7)) |
| 4934 | MURF2 BioMark pre-edited REV | AATATAAAATCTAGATCAAACCATCACA | ([Carnes et al. 2005](#_ENREF_7)) |
| 4933 | MURF2 BioMark edited FOR | GATTTTAATGTTTGGTTGTTTTAATTTAG | ([Carnes et al. 2005](#_ENREF_7)) |
| 4934 | MURF2 BioMark edited REV | AATATAAAATCTAGATCAAACCATCACA | ([Carnes et al. 2005](#_ENREF_7)) |
| 4965 | ND3 BioMark pre-edited FOR | GAATGGGAGATGGGTTTTGG | ([Carnes et al. 2005](#_ENREF_7)) |
| 4966 | ND3 BioMark pre-edited REV | AACAAATCTCTTTACCCCCTTCAG | ([Carnes et al. 2005](#_ENREF_7)) |
| 4963 | ND3 BioMark edited FOR | TGTTTTCGTTGTTGTTTGTGGTT | (Carnes et al., 2005) |
| 4964 | ND3 BioMark edited REV | CAATGTATAAAACACCAAACGTGAATT | (Carnes et al., 2005) |
| 4953 | ND8 BioMark pre-edited FOR | GATTTTTGCCAACGCATTCAG | ([Carnes et al. 2018](#_ENREF_6)) |
| 4954 | ND8 BioMark pre-edited REV | CACCGTGTAATTCTAAATTTCTCACTTC | ([Carnes et al. 2018](#_ENREF_6)) |
| 6402 | ND8 BioMark edited FOR | AATTTGCCCTAGTTTAGCATTGG | ([Carnes et al. 2018](#_ENREF_6)) |
| 6403 | ND8 BioMark edited REV | ATCAATCCGCAAAACGATGA | ([Carnes et al. 2018](#_ENREF_6)) |
| 5069 | ND4 BioMark FOR | CAATCTGACCATTCCATGTGTGA | ([Carnes et al. 2005](#_ENREF_7)) |
| 5070 | ND4 BioMark REV | TTTCAGCACAATACTTGCTAATAAAACA | ([Carnes et al. 2005](#_ENREF_7)) |
| 5067 | COI BioMark FOR | CCCGATATGGTATTTCCTCGTATAAA | ([Carnes et al. 2008](#_ENREF_8)) |
| 5068 | COI BioMark REV | CCCCCATACCCTCTTCAGTCA | ([Carnes et al. 2008](#_ENREF_8)) |
| 10674 | ND1 BioMark FOR | GGACTGCTTCTTGATGGATTACGTTTACC | ([Etheridge et al. 2008](#_ENREF_9)) |
| 10675 | ND1 BioMark REV | AGATAATTCAGTAACAAGGCCAGCAACAAG | ([Etheridge et al. 2008](#_ENREF_9)) |
| 10672 | ND2 BioMark FOR | GTTTACTACTTGCATGTCTCTTTCTTTG | ([Etheridge et al. 2008](#_ENREF_9)) |
| 10673 | ND2 BioMark REV | AAAGCCAATACAAATACAAAGGTAACTTAG | ([Etheridge et al. 2008](#_ENREF_9)) |
| 10676 | ND5 BioMark FOR | TTTCTATATGTTTGTTAGTAGGATGTGCGTTC | ([Aphasizheva and Aphasizhev 2010](#_ENREF_3)) |
| 10677 | ND5 BioMark REV | GCGTGTATTAATGCTGATACTGGGATAGG | ([Aphasizheva and Aphasizhev 2010](#_ENREF_3)) |
| 10664 | 9S rRNA BioMark FOR | ATTAGATTGTTTTGTTAATGCTATTAGATG | ([Aphasizheva et al. 2011](#_ENREF_4)) |
| 10665 | 9S rRNA BioMark REV | ACGGCTGGCATCCATTTC | ([Aphasizheva et al. 2011](#_ENREF_4)) |
| 10662 | 12S rRNA BioMark FOR | GGGCAAGTCCTACTCTCCTTTACAAAG | ([Aphasizheva et al. 2011](#_ENREF_4)) |
| 10663 | 12S rRNA BioMark REV | TGAACAATCAATCATGGTAATAAGTAGACGATG | ([Aphasizheva et al. 2011](#_ENREF_4)) |
| 11131 | TAP-tag BioMark FOR | GAAAATCTCATCCTCCGGGGC | ([McDermott et al. 2015](#_ENREF_17)) |
| 11132 | TAP-tag BioMark REV | GCGGTTTTGAGCTCACCCTG | ([McDermott et al. 2015](#_ENREF_17)) |
| 3623 | FOR ND8 pre-edited/edited RT-PCR | CAATTTAATAATTTTAAGTTTTGG | This Study |
| 3624 | REV ND8 pre-edited/edited RT-PCR | TAGTCAAAATTTAATTTCACCGTG | This Study |
| 7263 | FOR ND3 pre-edited/edited RT-PCR | CCTCGCCTTTTTACTTTAGTTTGTTATCA | This Study |
| 4805 | REV ND3 pre-edited/edited RT-PCR | TAATATGTATAATACAAC | This Study |
| 6204 | FOR MURF2 pre-edited/edited RT-PCR | ATAGAAAGGTATATAATCTATAATG | ([Guo et al. 2010](#_ENREF_11)) |
| 4934 | REV MURF2 pre-edited/edited RT-PCR | AATATAAAATCTAGATCAAACCATCACA | ([Carnes et al. 2005](#_ENREF_7)) |
| 3704 | FOR A6 pre-edited/edited RT-PCR | AAAAATAAGTATTTTGATATTATTAAAG | ([Schnaufer et al. 2001](#_ENREF_19); [Guo et al. 2010](#_ENREF_11)) |
| 3580 | REV A6 pre-edited/edited RT-PCR | TATTATTAACTTATTTGATC | ([Schnaufer et al. 2001](#_ENREF_19); [Guo et al. 2010](#_ENREF_11)) |

**Supplementary Table 4.** Antibodies used in this study.

| **Antibody name** | **Raised in** | **Dilution** | **Source** |
| --- | --- | --- | --- |
| V5 Epitope Tag Monoclonal Antibody | Mouse | 1/5000 WB | ThermoFisher Scientific  R960-25 |
| rPAP (recombinant Peroxidase Anti-Peroxidase) | Rabbit | 1/2000 WB | Sigma  P1291 |
| RESC1  Monoclonal Antibody | Mouse | 1/25 WB | ([Panigrahi et al. 2008](#_ENREF_18))  mAb53 |
| RESC13  Polyclonal Antibody | Rabbit | 1/5000 WB | ([Fisk et al. 2008](#_ENREF_10)) |
| mtHSP70  Monoclonal Antibody | Mouse | 1/1000 WB | ([Allen et al. 1998](#_ENREF_1))  mAb78 |

Allen TE, Heidmann S, Reed R, Myler PJ, Goringer HU, Stuart KD. 1998. Association of guide RNA binding protein gBP21 with active RNA editing complexes in Trypanosoma brucei. *Molecular and cellular biology* **18**: 6014-6022.

Ammerman ML, Presnyak V, Fisk JC, Foda BM, Read LK. 2010. TbRGG2 facilitates kinetoplastid RNA editing initiation and progression past intrinsic pause sites. *Rna* **16**: 2239-2251.

Aphasizheva I, Aphasizhev R. 2010. RET1-catalyzed uridylylation shapes the mitochondrial transcriptome in Trypanosoma brucei. *Molecular and cellular biology* **30**: 1555-1567.

Aphasizheva I, Maslov D, Wang X, Huang L, Aphasizhev R. 2011. Pentatricopeptide repeat proteins stimulate mRNA adenylation/uridylation to activate mitochondrial translation in trypanosomes. *Molecular cell* **42**: 106-117.

Brenndorfer M, Boshart M. 2010. Selection of reference genes for mRNA quantification in Trypanosoma brucei. *Molecular and biochemical parasitology* **172**: 52-55.

Carnes J, McDermott SM, Stuart K. 2018. RNase III Domain of KREPB9 and KREPB10 Association with Editosomes in Trypanosoma brucei. *mSphere* **3**.

Carnes J, Trotter JR, Ernst NL, Steinberg A, Stuart K. 2005. An essential RNase III insertion editing endonuclease in Trypanosoma brucei. *Proceedings of the National Academy of Sciences of the United States of America* **102**: 16614-16619.

Carnes J, Trotter JR, Peltan A, Fleck M, Stuart K. 2008. RNA editing in Trypanosoma brucei requires three different editosomes. *Molecular and cellular biology* **28**: 122-130.

Etheridge RD, Aphasizheva I, Gershon PD, Aphasizhev R. 2008. 3' adenylation determines mRNA abundance and monitors completion of RNA editing in T. brucei mitochondria. *The EMBO journal* **27**: 1596-1608.

Fisk JC, Ammerman ML, Presnyak V, Read LK. 2008. TbRGG2, an essential RNA editing accessory factor in two Trypanosoma brucei life cycle stages. *The Journal of biological chemistry* **283**: 23016-23025.

Guo X, Ernst NL, Carnes J, Stuart KD. 2010. The zinc-fingers of KREPA3 are essential for the complete editing of mitochondrial mRNAs in Trypanosoma brucei. *PloS one* **5**: e8913.

Guo X, Ernst NL, Stuart KD. 2008. The KREPA3 zinc finger motifs and OB-fold domain are essential for RNA editing and survival of Trypanosoma brucei. *Molecular and cellular biology* **28**: 6939-6953.

Jensen BC, Brekken DL, Randall AC, Kifer CT, Parsons M. 2005. Species specificity in ribosome biogenesis: a nonconserved phosphoprotein is required for formation of the large ribosomal subunit in Trypanosoma brucei. *Eukaryotic cell* **4**: 30-35.

Kramer S, Marnef A, Standart N, Carrington M. 2012. Inhibition of mRNA maturation in trypanosomes causes the formation of novel foci at the nuclear periphery containing cytoplasmic regulators of mRNA fate. *J Cell Sci* **125**: 2896-2909.

Leeder WM, Hummel NF, Goringer HU. 2016. Multiple G-quartet structures in pre-edited mRNAs suggest evolutionary driving force for RNA editing in trypanosomes. *Sci Rep* **6**: 29810.

McAdams NM, Ammerman ML, Nanduri J, Lott K, Fisk JC, Read LK. 2015. An arginine-glycine-rich RNA binding protein impacts the abundance of specific mRNAs in the mitochondria of Trypanosoma brucei. *Eukaryotic cell* **14**: 149-157.

McDermott SM, Guo X, Carnes J, Stuart K. 2015. Differential Editosome Protein Function between Life Cycle Stages of Trypanosoma brucei. *The Journal of biological chemistry* **290**: 24914-24931.

Panigrahi AK, Zikova A, Dalley RA, Acestor N, Ogata Y, Anupama A, Myler PJ, Stuart KD. 2008. Mitochondrial complexes in Trypanosoma brucei: a novel complex and a unique oxidoreductase complex. *Mol Cell Proteomics* **7**: 534-545.

Schnaufer A, Panigrahi AK, Panicucci B, Igo RP, Jr., Wirtz E, Salavati R, Stuart K. 2001. An RNA ligase essential for RNA editing and survival of the bloodstream form of Trypanosoma brucei. *Science* **291**: 2159-2162.

Shi H, Djikeng A, Tschudi C, Ullu E. 2004. Argonaute protein in the early divergent eukaryote Trypanosoma brucei: control of small interfering RNA accumulation and retroposon transcript abundance. *Molecular and cellular biology* **24**: 420-427.
